# Supplementary material for: MicroRNA-146a modulates B-cell oncogenesis by regulating Egr1
Source: PubMed Central journal article supplement (PMC4484436; doi:10.18632/oncotarget.3433), 2015-04-13
Supplement: oncotarget-06-11023-s001.pdf [file oncotarget-06-11023-s001.pdf]

## SUPPLEMENTARY FIGURES AND TABLES

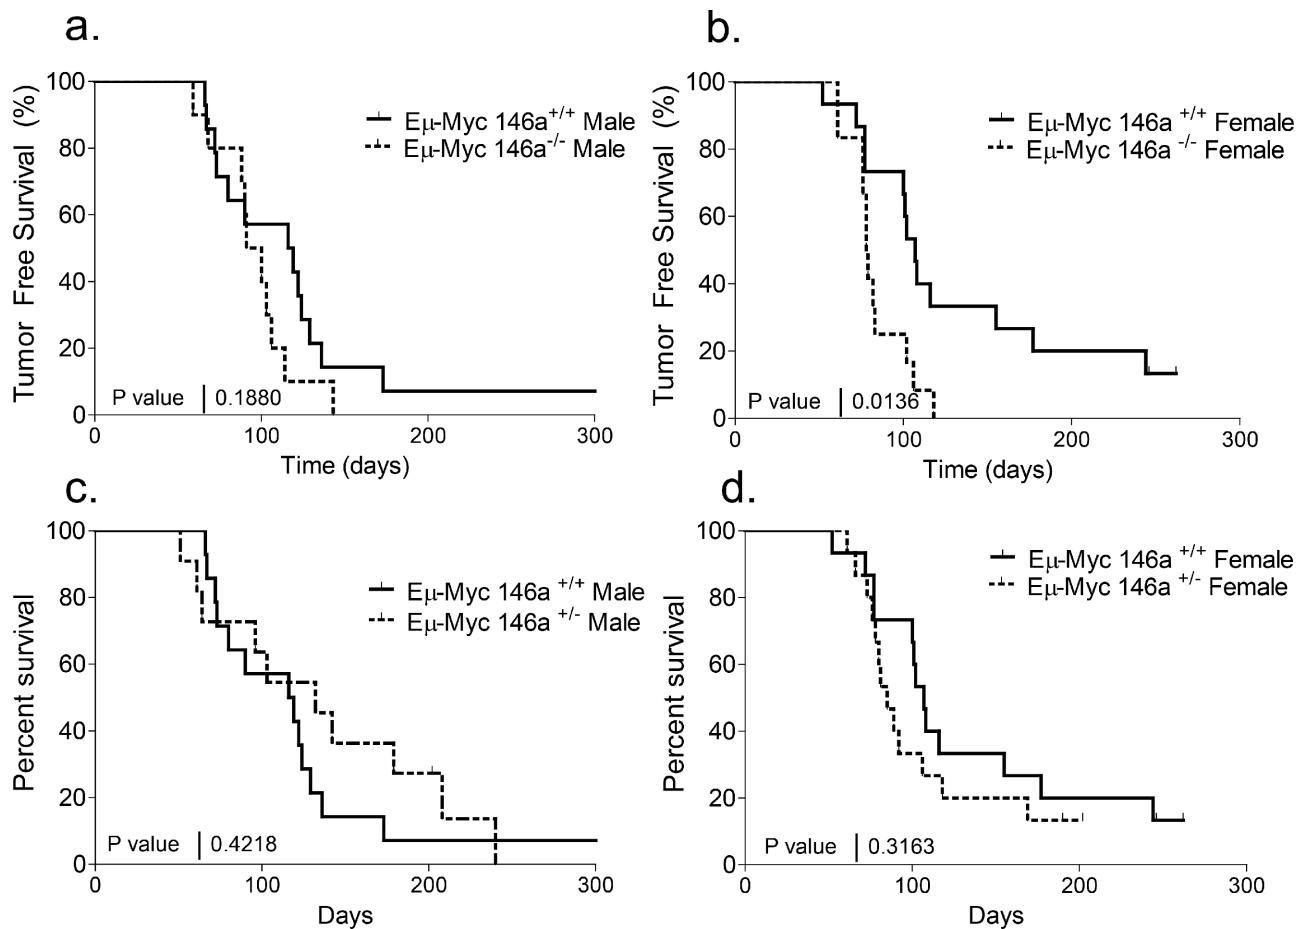

**Supplementary Figure S1: miR-146a deficiency causes increased mortality in female  $E\mu$ -Myc mice.** (a) Tumor-free survival curve of male mice with  $E\mu$ -Myc oncogene and either wild-type or homozygous deficiency of miR-146a ( $n = 14$  for  $E\mu$ -Myc miR-146a<sup>+/+</sup>,  $n = 10$  for  $E\mu$ -Myc miR-146a<sup>-/-</sup>; Log-Rank Test,  $p = 0.1880$ ). (b) Tumor-free survival curve of female mice with  $E\mu$ -Myc oncogene and either wild-type or homozygous deficiency of miR-146a ( $n = 15$  for  $E\mu$ -Myc miR-146a<sup>+/+</sup>,  $n = 12$  for  $E\mu$ -Myc miR-146a<sup>-/-</sup>; Log-rank Test,  $p = 0.0136$ ). (c) Tumor-free survival curve of male mice with  $E\mu$ -Myc oncogene and either wild-type or heterozygous deficiency of miR-146a ( $n = 14$  for  $E\mu$ -Myc miR-146a<sup>+/+</sup>,  $n = 11$  for  $E\mu$ -Myc miR-146a<sup>+/-</sup>; Log-Rank Test,  $p = 0.4218$ ). (d) Tumor free survival curve of female mice with  $E\mu$ -Myc oncogene and either wild-type or heterozygous deficiency of miR-146a ( $n = 15$  for  $E\mu$ -Myc miR-146a<sup>+/+</sup>,  $n = 15$  for  $E\mu$ -Myc miR-146a<sup>+/-</sup>; Log-Rank Test,  $p = 0.3163$ ).

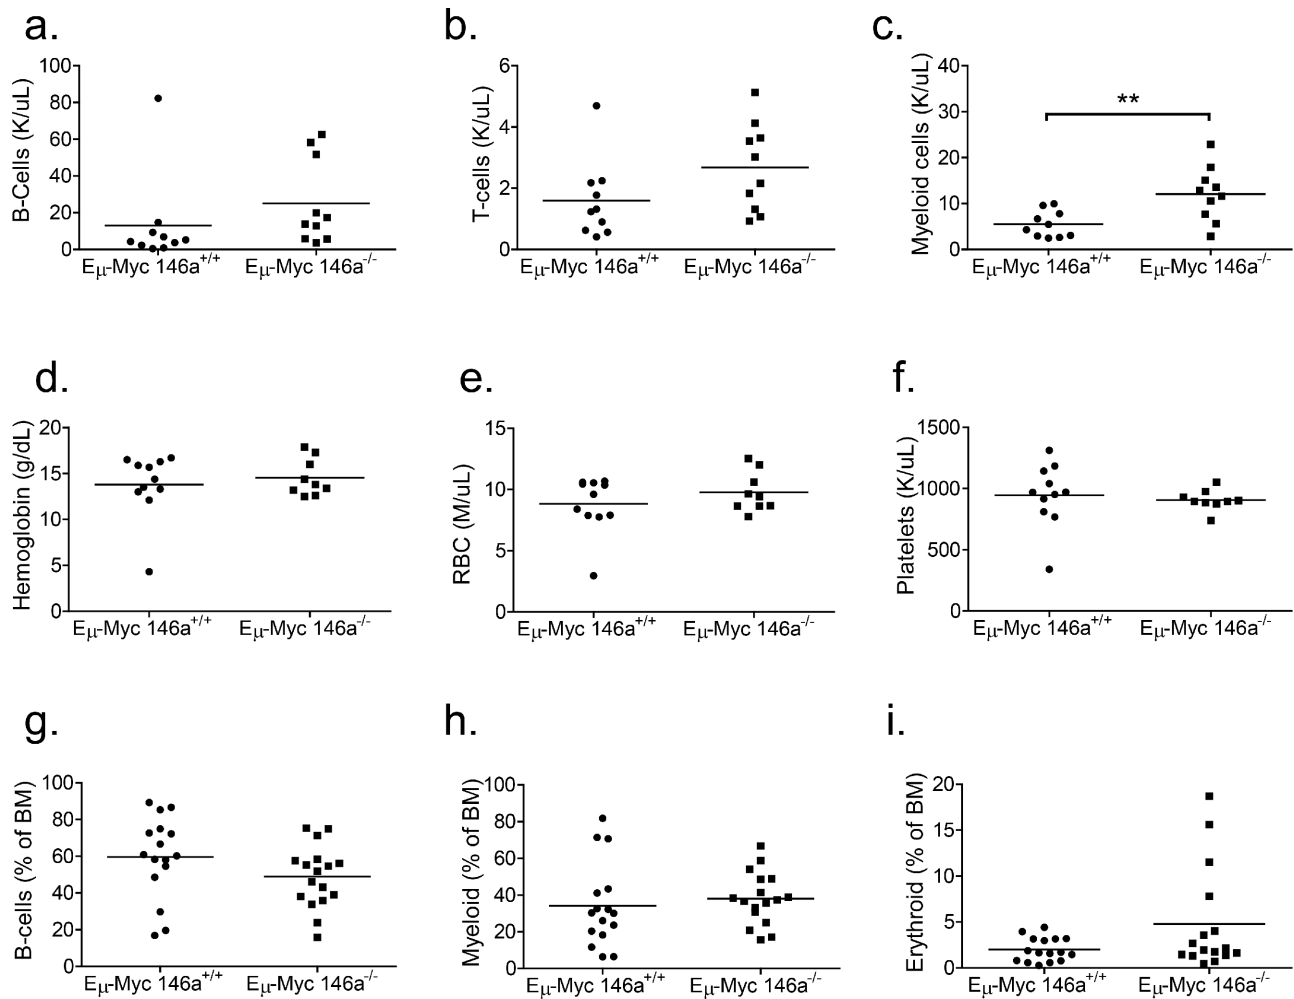

**Supplementary Figure S2: Blood and bone marrow composition in E $\mu$ -Myc animals at the time of death.** (a–c) Quantitation of absolute number of B-cells (a), T-cells (b), and Myeloid cells (c) based on CBC and FACS analysis of blood at time of death ( $n = 10$  E $\mu$ -MycmiR-146a<sup>+/+</sup>, and  $n = 10$  E $\mu$ -Myc miR-146a<sup>-/-</sup>;  $t$ -test  $p = 0.2719$ ,  $0.0904$  and  $0.0052$  respectively). (d–i) Hemoglobin levels, red blood cell, and platelet counts at time of death ( $n = 11$  E $\mu$ -MycmiR-146a<sup>+/+</sup>, and  $n = 9$  E $\mu$ -Myc miR-146a<sup>-/-</sup>;  $t$ -test,  $p = 0.5663$ ,  $0.3150$  and  $0.6521$  respectively). Percentage of B-cells (g), Myeloid (h), and Erythroid (i) cells in the bone marrow of mice at time of death ( $n = 16$  E $\mu$ -Myc miR-146a<sup>+/+</sup>, and  $n = 17$  E $\mu$ -Myc miR-146a<sup>-/-</sup>;  $t$ -test,  $p = 0.1250$ ,  $0.5529$  and  $0.0635$  respectively).

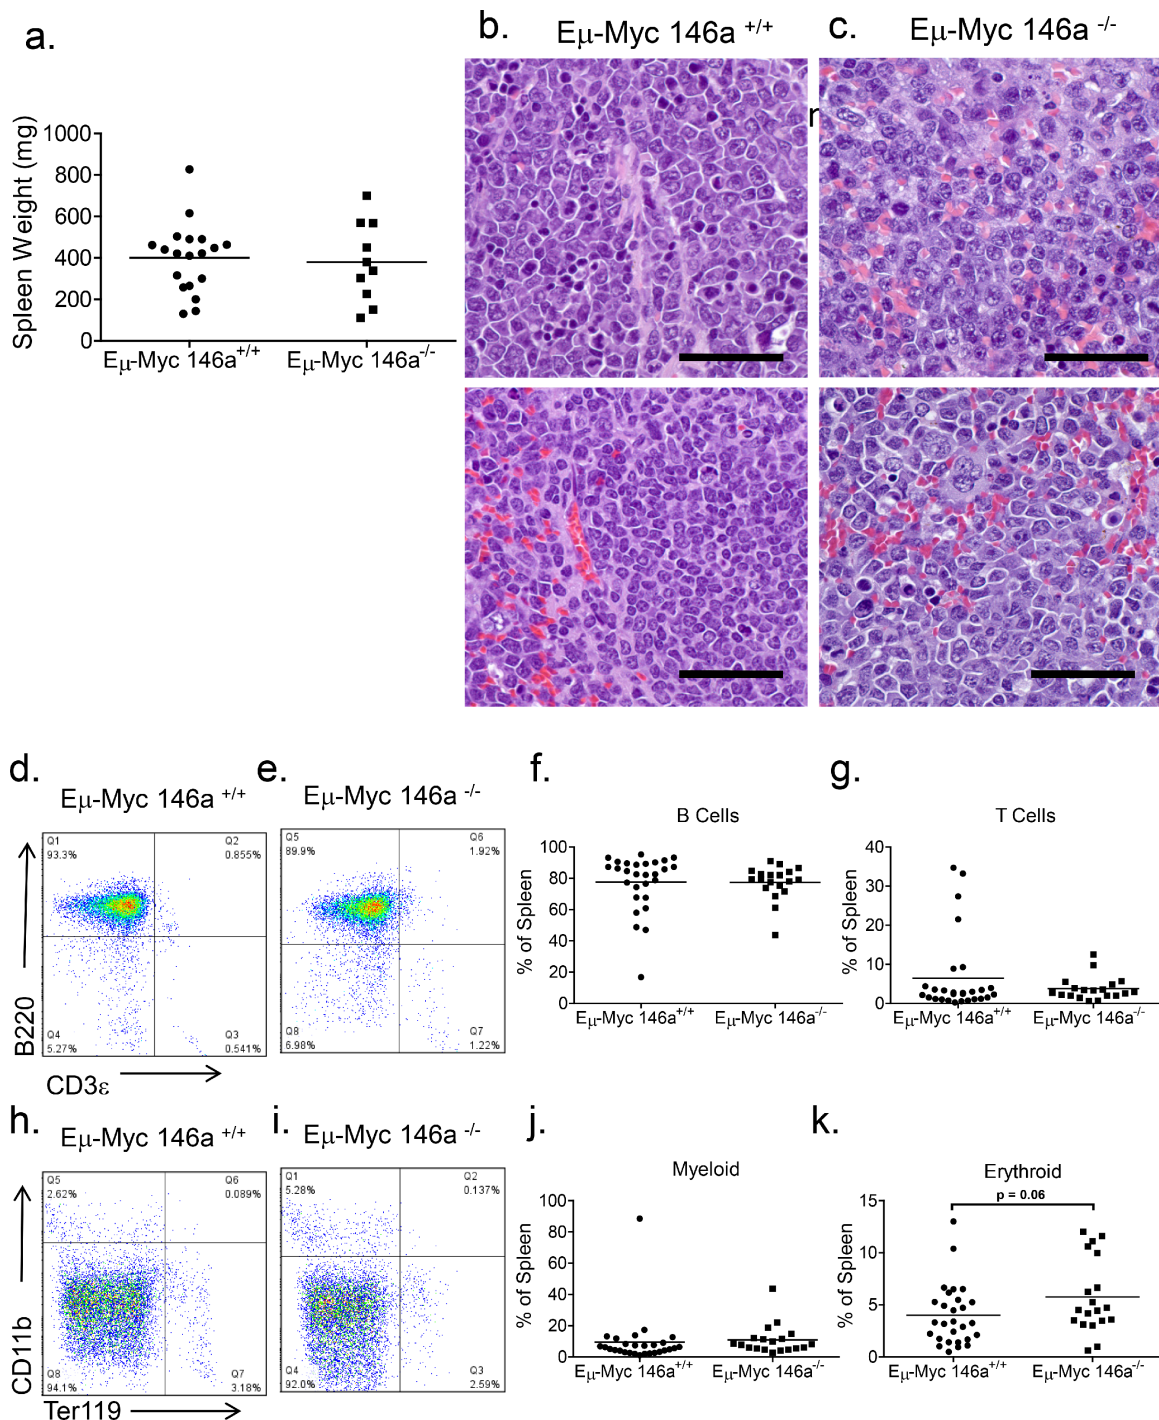

**Supplementary Figure S3: Analysis of spleens from  $E_{\mu}$ -Myc animals deficient for miR-146a.** (a) Spleen weights at the time of death for all animals where data was available ( $n = 19$   $E_{\mu}$ -Myc miR-146a<sup>+/+</sup> and  $n = 10$   $E_{\mu}$ -Myc 146a<sup>-/-</sup>;  $t$ -test,  $p = 0.7662$ ). (b–c) Representative high power images of paraffin embedded H&E stained tumor samples showing red (top panels), and white (bottom panels) pulp of splenic tumors from  $E_{\mu}$ -Myc animals sufficient or deficient for miR-146a. (d–e, h–i) Representative FACS plots from  $E_{\mu}$ -Myc miR-146a<sup>+/+</sup> and  $E_{\mu}$ -Myc miR-146a<sup>-/-</sup> spleens stained with B220 and CD3ε, or CD11b and Ter119, respectively. (f–g, j–k) Quantitation of the percentage of B-lymphocytes, T-lymphocytes, Myeloid or Erythroid cells in the spleens of  $E_{\mu}$ -Myc miR-146a<sup>+/+</sup> and  $E_{\mu}$ -Myc miR-146a<sup>-/-</sup> mice, based on FACS ( $n = 28$ ,  $E_{\mu}$ -Myc miR-146a<sup>+/+</sup>, and  $n = 19$ ,  $E_{\mu}$ -Myc miR-146a<sup>-/-</sup>;  $t$ -test,  $p = 0.9505$ ,  $0.2568$ ,  $0.7114$ , and  $0.0600$  respectively).

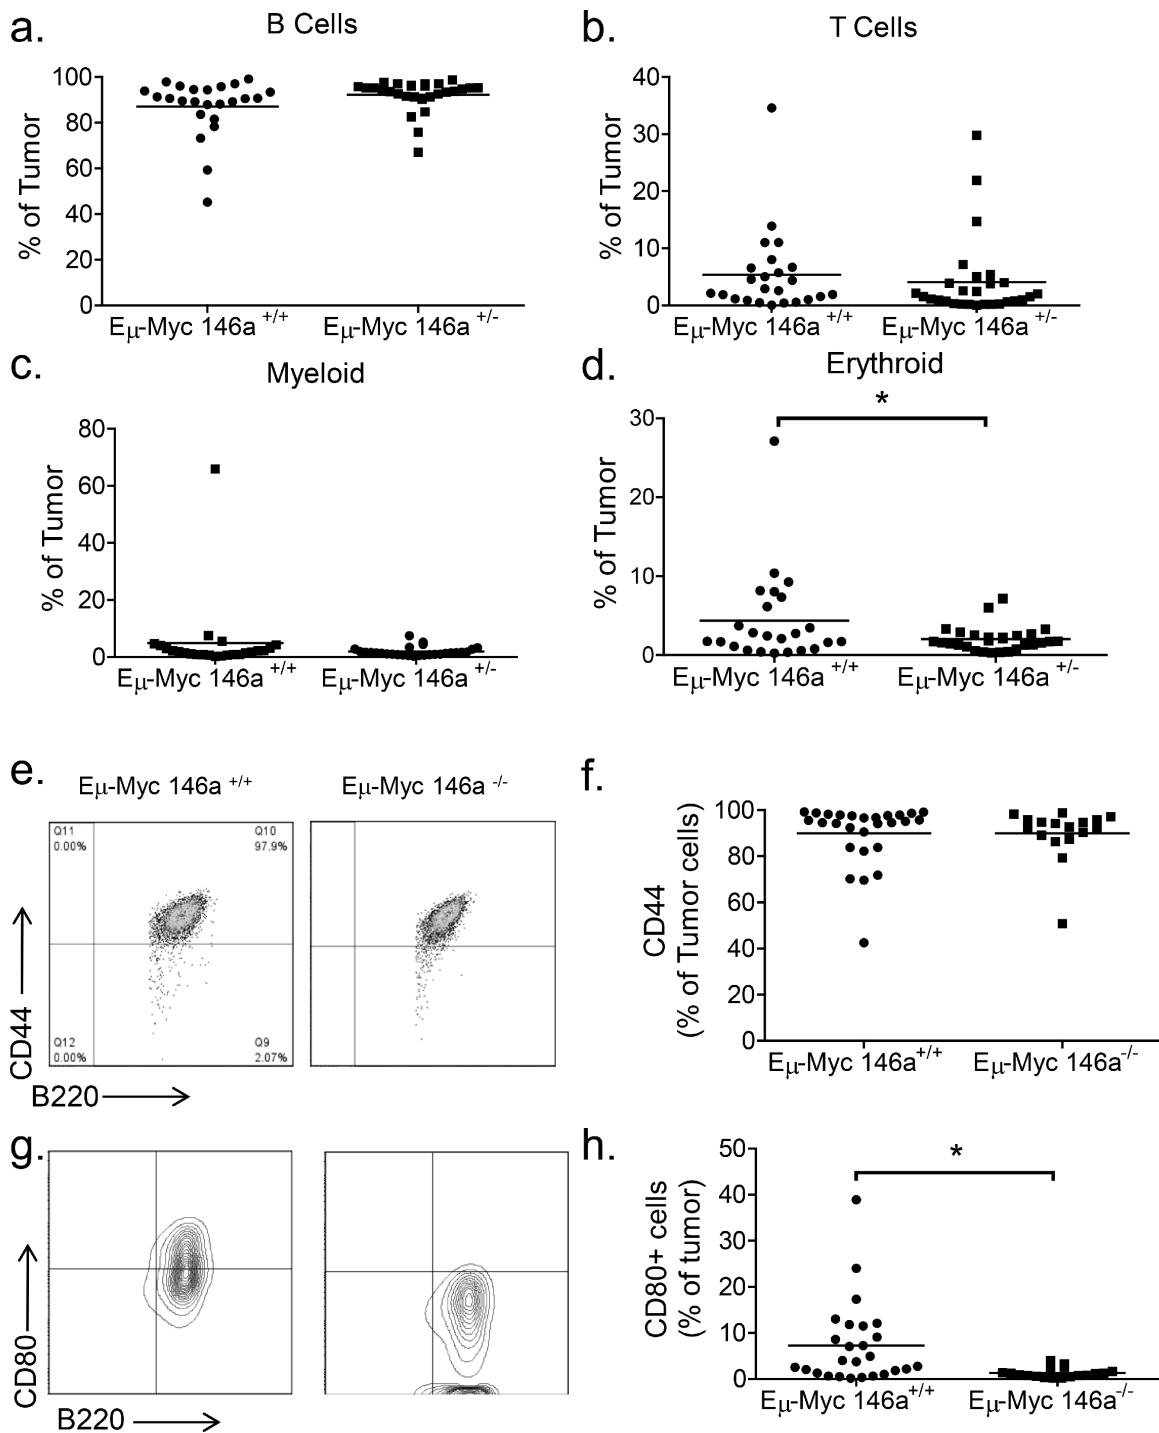

**Supplementary Figure S4: Immunophenotypic properties of tumors in mice with heterozygous and homozygous deficiency of miR-146a.** (a–d) B-, T-, myeloid, and erythroid cells, respectively, quantitated by FACS in tumors from mice carrying the  $E_{\mu}$ -Myc oncogene and wild-type or heterozygous for miR-146a ( $n = 24$  for  $E_{\mu}$ -Myc miR-146a<sup>+/+</sup> and  $n = 28$  for  $E_{\mu}$ -Myc miR-146a<sup>+/-</sup>;  $t$ -test  $p = 0.0704$ ,  $0.5164$  and  $0.2368$ ,  $0.0427$  respectively). (e) Representative FACS plots from  $E_{\mu}$ -Myc 146a<sup>+/+</sup> or  $E_{\mu}$ -Myc 146a<sup>-/-</sup> tumors stained with CD44 and B220. (f) Quantitation of all mice where data was available for the percent of CD44 positive cells in tumors from  $E_{\mu}$ -Myc 146a<sup>+/+</sup> or  $E_{\mu}$ -Myc 146a<sup>-/-</sup> ( $n = 27$   $E_{\mu}$ -Myc 146a<sup>+/+</sup> and  $n = 17$   $E_{\mu}$ -Myc 146a<sup>-/-</sup>;  $T$ -Test,  $p = 0.9922$ ). (g) Representative FACS plots from  $E_{\mu}$ -Myc 146a<sup>+/+</sup> or  $E_{\mu}$ -Myc 146a<sup>-/-</sup> tumors stained with CD80 and B220. (h) Quantitation of all mice where data was available for the percent of CD80 positive cells in tumors from  $E_{\mu}$ -Myc 146a<sup>+/+</sup> or  $E_{\mu}$ -Myc 146a<sup>-/-</sup> ( $n = 27$   $E_{\mu}$ -Myc 146a<sup>+/+</sup> and  $n = 17$   $E_{\mu}$ -Myc 146a<sup>-/-</sup>;  $T$ -Test,  $p = 0.0069$ ).



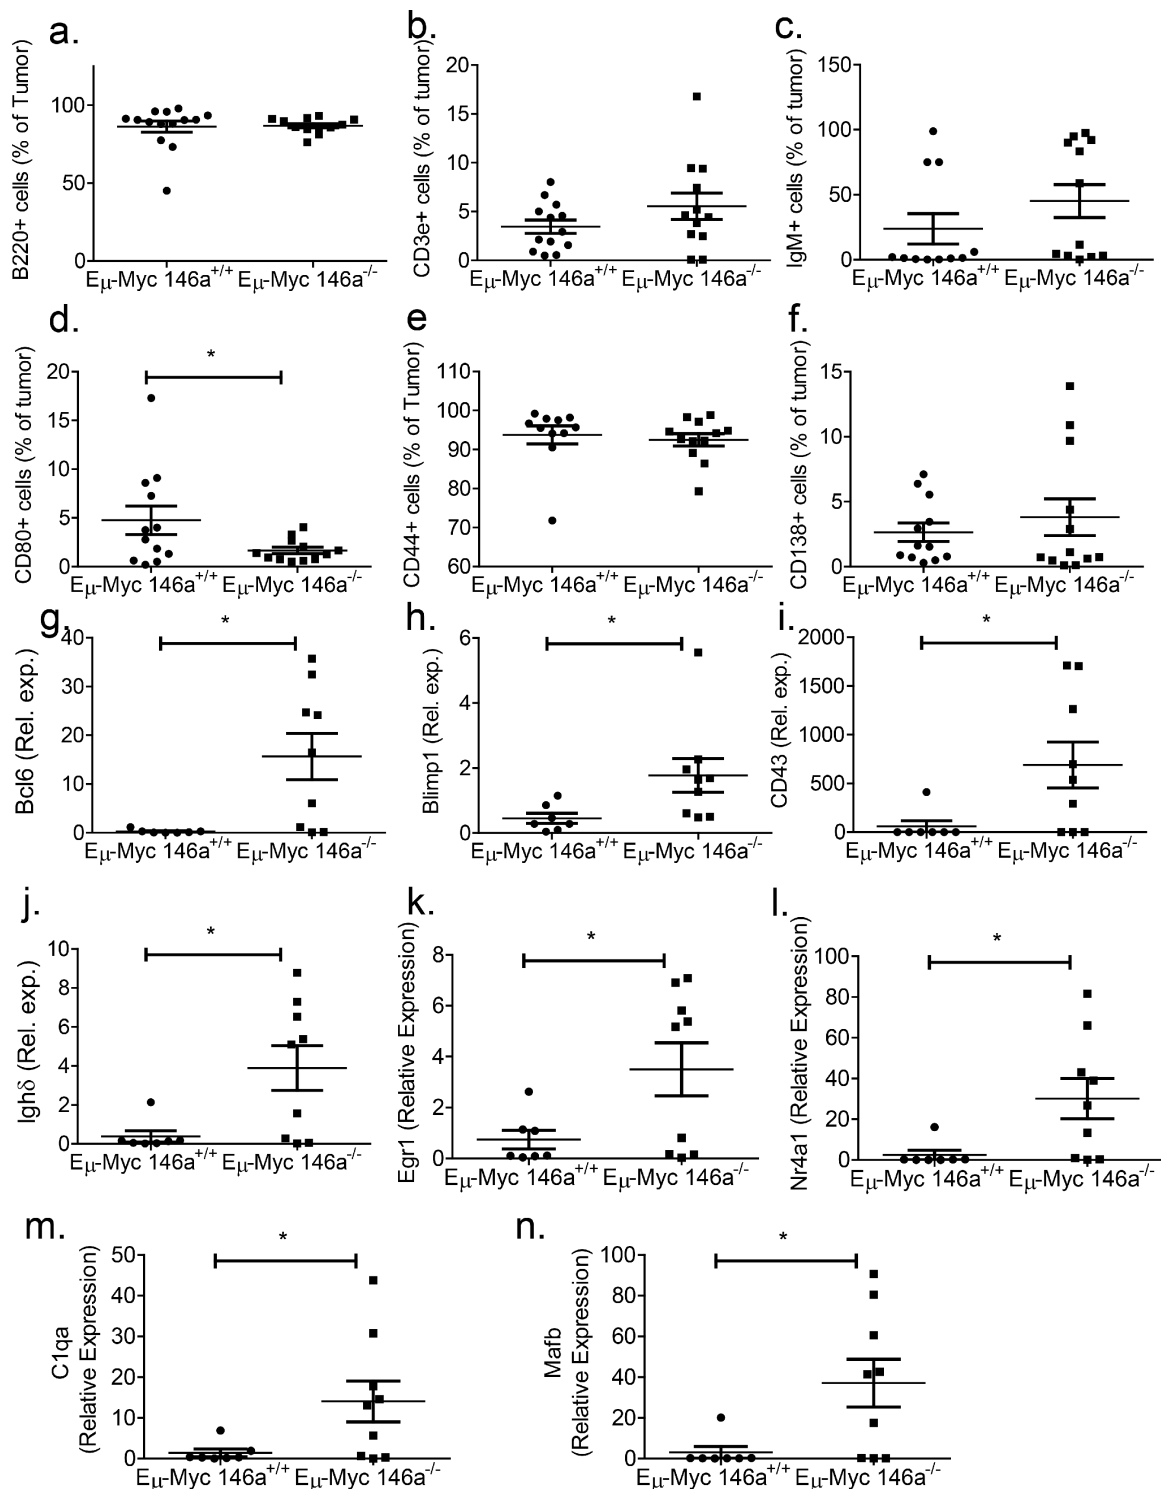

**Supplementary Figure S5: Analysis of immunophenotypic and gene expression features of tumors from female Eμ-Myc 146a<sup>-/-</sup> mice.** (a–f) Quantitation of B220<sup>+</sup> (a), CD3e<sup>+</sup> (b), IgM<sup>+</sup> (c), CD80<sup>+</sup> (d), CD44<sup>+</sup> (e) and CD138<sup>+</sup> (f) cells from female mice that carry the Eμ-Myc transgene and are either sufficient or deficient for miR-146a. Only CD80 expression is significantly different (*T*-test, *p* = 0.0487). This may be due to the reduced numbers of animals available for the analysis (*n* = 12 Eμ-Myc 146a<sup>+/+</sup> and *n* = 12 Eμ-Myc 146a<sup>-/-</sup>). (g–j) RT-qPCR analyses of B-cell maturation associated transcripts from female mice that carry the Eμ-Myc transgene and are either sufficient or deficient for miR-146a. All comparisons showed a statistically significant difference (*p* < 0.05 for all comparisons between the mice; *n* = 7 Eμ-Myc 146a<sup>+/+</sup> and *n* = 9 Eμ-Myc 146a<sup>-/-</sup>). (k–n) RT-qPCR analyses of Egr1 and putative Egr1-regulated transcripts from female mice that carry the Eμ-Myc transgene and are either sufficient or deficient for miR-146a. All comparisons showed a statistically significant difference (*p* < 0.05 for all comparisons between the mice; *n* = 7 Eμ-Myc 146a<sup>+/+</sup> and *n* = 9 Eμ-Myc 146a<sup>-/-</sup>).

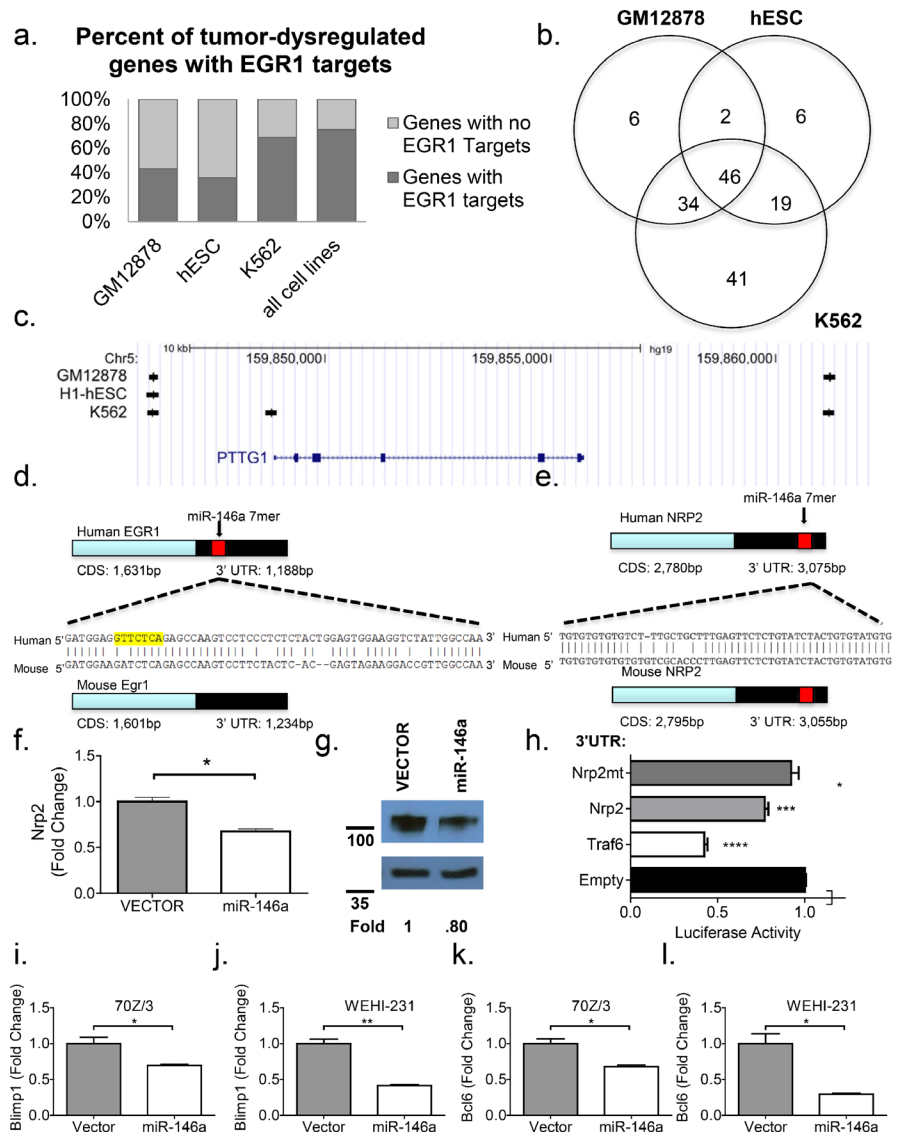

**Supplementary Figure S6: High throughput analyses for EGR1 TFBS and demonstration of a novel miR-146a target, *Nrp2*.** (a) Plot showing the numbers of genes that were differentially regulated in miR-146a deficient tumors that have EGR1 binding sites in the three different cell lines. Note that the K562 cell line had the highest number of binding sites. The cell lines displayed a wide range in the total number of EGR1 transcription factor binding sites (TFBS). The K562 cell line had a total of 36,367 sites representing 12,741 genes, the GM12878 line had 16,530 sites representing 9,170 genes, and the H1-hESC line had only 8,818 sites representing 6,349 genes. There exists a wide range in the total number of EGR1 TFBS sites as well as the total genes with EGR1 binding sites. In the K562 cell line, 62% of total protein coding genes are putatively regulated by EGR1. In the H1-hESC line 31% of genes have EGR1 TFBS and in GM12878 line 45% of genes have EGR1 TFBS sites. When all three cell lines are combined, there are a total of 62,071 sites representing 13,944 unique genes. (b) Intersection of differentially regulated genes from the RNA-Seq dataset overlaid with the genes containing EGR1 TFBS obtained from ChIP-Seq data of the three different cell lines. (c) *Pttg1* is a differentially regulated gene in miR-146a deficient tumors. It is found on chromosome 5 and has EGR1 transcription factor binding sites based on the reanalyzed ChIP-Seq data presented above. (d) Schematic representation of human and mouse *Egr1* gene showing the miR-146a binding site in the 3'UTR. (e) Schematic representation of human and mouse *Nrp2* gene showing the miR-146a binding site in the 3'UTR. (f) RT-qPCR analysis of *Nrp2* in 70Z/3 cell lines either expressing MGP or MGP-miR-146a vector (*t*-test,  $p = 0.0148$ ). (g) Western blot analysis for NRP2 after miR-146a shows reduction in the protein levels in 70Z/3 cells when compared to the reference gene actin (upper panel: Nrp2 and lower panel,  $\beta$ -actin). Shown below are fold repression computed using ImageJ software. (h) Luciferase assays showing repression seen with MGP/miR-146a co-transfection relative to MGP alone for each of the UTRs depicted. Each measurement is representative of firefly luciferase normalized to renilla luciferase, and was performed in duplicate, with the experiment was repeated at least three times (*T*-test; Traf6 v Vector,  $p < 0.0001$ ; Nrp2 vs. vector,  $p = 0.0005$ ; Nrp2 vs. mutant Nrp2,  $p = 0.033$ ). (i-l) RT-qPCR analyses of Blimp1 and Bcl6 in 70Z/3 and WEHI-231 cells that are overexpressing miR-146a. All comparisons showed statistically significant downregulation of these genes in miR-146a overexpressing cell lines ( $*p < 0.05$ ;  $**p < 0.005$ ).

**Supplementary Table S1: RT-qPCR primers and genotyping primers used.** Listed are the primers used for RNAseq data validation, genotyping miR-146a and E $\mu$ -Myc allele, and cloning. 5'P\* indicates phosphorylated 5' end.

| RT-qPCR primers | Direction | Sequence                      |
|-----------------|-----------|-------------------------------|
| Jhy             | FOW       | 5' GGTGCCGGCAGGATGAATAA 3'    |
|                 | REV       | 5' AAGTTGGTGTGATGGACGGG 3'    |
| Cacna1h         | FOW       | 5' ATGCTTGGGAACGTGCTTCTT 3'   |
|                 | REV       | 5' GTCTGGTAGTATGGCCGCAA 3'    |
| Camk2b          | FOW       | 5' TGGTGAACAAGCCAAGAGTTT 3'   |
|                 | REV       | 5' GAGGGAGAGATCCTTTGGGG 3'    |
| Myo18b          | FOW       | 5' AGAACAATGGAGTCCGCTGG 3'    |
|                 | REV       | 5' GCTGGCTGTGGATCTTCTGT 3'    |
| Pttg1           | FOW       | 5' CCTCCAACAAAACAGCC 3'       |
|                 | REV       | 5' TCCCTTACCAGATTCCCATGAT 3'  |
| Axl             | FOW       | 5' GTGGTTCCAGACAACCTACG 3'    |
|                 | REV       | 5' CGGATGTGATACGGGGTGTG 3'    |
| Egr1            | FOW       | 5' TTGTGGCCTGAACCCCTTTT 3'    |
|                 | REV       | 5' AGATGGGACTGCTGTCGTTG 3'    |
| Oaf             | FOW       | 5' GAAGGGGCAGAGTCAGTTCC 3'    |
|                 | REV       | 5' GTTTTCTGCCGGAGCTTGG 3'     |
| Nrp2            | FOW       | 5' GCTGGCTACATCACTTCCCC 3'    |
|                 | REV       | 5' CAATCCACTCACAGTTCTGGTG 3'  |
| Dtx3            | FOW       | 5' ACCCAATGTCATCACTTGGAAAC 3' |
|                 | REV       | 5' CCTCTTGACCCTAGTCAGGT 3'    |
| Mafb            | FOW       | 5'TGGATGGCGAGCAACTACC3'       |
|                 | REV       | 5'CCAGGTCATCGTGAGTCACA3'      |
| Nr4a            | FOW       | 5'TTGAGTTCGGCAAGCCTACC3'      |
|                 | REV       | 5'GTGTACCCGTCCATGAAGGTG3'     |
| C1qa            | FOW       | 5'AAAGGCAATCCAGGCAATATCA3'    |
|                 | REV       | 5'TGGTTCTGGTATGGACTCTCC3'     |
| Bcl6            | FOW       | 5'CCGGCACGCTAGTGATGTT3'       |
|                 | REV       | 5'TGTCTTATGGGCTCTAAACTGCT3'   |
| IgD             | FOW       | 5'CTTAGCTGCCGAGAGGGGATG3'     |
|                 | REV       | 5'ACACTGTGCTCGAAGGTGTT3'      |
| IgM             | FOW       | 5'AACATTGCTGGCAGGGGTAG3'      |
|                 | REV       | 5'ACCAGAGGTTGTCCCTCCTT3'      |
| CD43            | FOW       | 5'GACCCACTTCCTTTCCCCCT3'      |
|                 | REV       | 5'CGTACCCAGCAAGATCATACCC3'    |

(Continued)

| RT-qPCR primers           | Direction | Sequence                                             |
|---------------------------|-----------|------------------------------------------------------|
| Bcl6                      | FOW       | 5'CCGGCACGCTAGTGATGTT3'                              |
|                           | REV       | 5'TGTCTTATGGGCTCTAAACTGCT3'                          |
| Blimp1                    | FOW       | 5'TTCTCTTGAAAAACGTGTGGG3'                            |
|                           | REV       | 5'GGAGCCGGAGCTAGACTTG3'                              |
| Traf6                     | FOW       | 5'GCACAAGTGCCAGTTGAC3'                               |
|                           | REV       | 5'TGCAAAATTGTCGGGAAACAGT3'                           |
| EGR1                      | FOW       | 5'GGTCAGTGGCCTAGTGAGC3'                              |
|                           | REV       | 5'GTGCCGCTGAGTAAATGGGA3'                             |
| mmu-miR-146a              |           | 5' UGAGAACUGAAUCCAUGGGUU 3'                          |
| <b>Cloning primers</b>    |           |                                                      |
| Egr1 CDS                  | FOW       | 5'AGCTAGA-AGATCT-TTCTCCAGCTCGCTGGTCC3'               |
|                           | REV       | 5'AGCATCT-CTCGAG-TTCCTGCCTCTCCCTTTGCT3'              |
| Egr1-3'-UTR               | FOW       | 5'TAATCTGGTTTAAACGAGCTCTGGAAGATCTCAGAGCCAAG3'        |
|                           | REV       | 5'TCGAATCCCTGCAGGCTCGAGGAACTTCATGTTTCATAACATACAAAA3' |
| Egr1-3'-UTR-Mutant        | FOW       | 5'P*ATGTCCACTGGACTGTCACCTC3'                         |
|                           | REV       | 5'P*GGCTGTTTCAGGCAGCTGAAG3'                          |
| EGR1-3'-UTR               | FOW       | 5'TAATCTGGTTTAAACGAGCTCGAGGAGATGGCCATAGGAGA3'        |
|                           | REV       | 5'TCGAATC-CCTGCAGGCTCGAGTACAAAATCGCCGCCTACT3'        |
| EGR1-3'-UTR-Mutant        | FOW       | 5'P*GATGGAGCTGGACTGGAGCCAA3'                         |
|                           | REV       | 5'P*TGACCTAAGAGGAACCCTCC3'                           |
| Nrp2-3'-UTR               | FOW       | 5'TAATCTGGTTTAAACGAGCTCACTGTGGTGGCCAAGTGAAT3'        |
|                           | REV       | 5'TCGAATCCCTGCAGGCTCGAGCAGCACTGAGTCCCACGTTA3'        |
| Nrp2-3'-UTR-Mutant        | FOW       | 5'P*ACCCTTGCTGGACTGTGTATCT3'                         |
|                           | REV       | 5'P*GCGACACACACACACACA3'                             |
| Traf6-3'-UTR              | FOW       | 5'TAATCTGGTTTAAAGAGCTCTGAAAATCACCCTGCCTGT3'          |
|                           | REV       | 5'TCGAATCCCTGCAGGCTCGAGGGATCCCCTCTGCTTCCTTA3'        |
| Traf6-3'-UTR-Mutant       | FOW       | 5'P*GGTGTGCTGGACTGTTAGTT3'                           |
|                           | REV       | 5'P*AGAGCGGTAACCTTCTACTG3'                           |
| Bcl6-3'-UTR               | FOW       | 5'TAATCTG- GTTTAAAC-GAGCTC-CCAGCCCCTTTCAGAATC3'      |
|                           | REV       | 5'TCGAATC-CCTGCAGG-CTCGAG CAACGCACTAATGCAGTTTAGA3'   |
| <b>Genotyping primers</b> |           |                                                      |
| miR-146a WT               | FOW       | 5' CTTGGACCAGCAGTCCTCTTGATGCACCTT 3'                 |
| miR-146a KO               | FOW       | 5' ATCGCGGCCGCTTTAAGTGTAGAGAGGGGGTCAAGTA 3'          |
|                           | REV       | 5' ATTGCTCAGCGGTGCTGTCCATCTGCACGA 3'                 |
| Eμ-Myc                    | FOW       | 5' ACCCAGGCTAAGAAGGCAAT 3'                           |
|                           | REV       | 5' GCTCCGGGGTGTAACAGTA 3'                            |

**Supplementary Table S2: Functional annotation results for gene expression data from miR-146a deficient tumors.** Genes that were differentially expressed between tumors from E $\mu$ -Myc 146a<sup>+/+</sup> and for E $\mu$ -Myc 146a<sup>-/-</sup> were used as the input in the DAVID Functional Annotation Tool for Functional Annotation Analysis. Listed are keywords associated with subgroups of genes.

| Term                    | Count | %           | P-Value     |
|-------------------------|-------|-------------|-------------|
| disulfide bond          | 67    | 28.5106383  | 4.68E-11    |
| signal                  | 74    | 31.4893617  | 1.45E-10    |
| Secreted                | 47    | 20          | 2.36E-10    |
| glycoprotein            | 79    | 33.61702128 | 1.03E-08    |
| innate immunity         | 11    | 4.680851064 | 1.82E-08    |
| complement pathway      | 7     | 2.978723404 | 4.80E-07    |
| immune response         | 12    | 5.106382979 | 1.23E-05    |
| collagen                | 8     | 3.404255319 | 6.11E-05    |
| transmembrane protein   | 15    | 6.382978723 | 1.35E-04    |
| inflammatory response   | 7     | 2.978723404 | 3.21E-04    |
| Growth factor binding   | 4     | 1.70212766  | 6.67E-04    |
| chemotaxis              | 6     | 2.553191489 | 8.23E-04    |
| Immunoglobulin domain   | 15    | 6.382978723 | 8.25E-04    |
| inflammation            | 4     | 1.70212766  | 9.79E-04    |
| extracellular matrix    | 10    | 4.255319149 | 9.99E-04    |
| gpi-anchor              | 7     | 2.978723404 | 0.003569296 |
| cell adhesion           | 12    | 5.106382979 | 0.005673897 |
| hydroxylation           | 5     | 2.127659574 | 0.006928978 |
| thiolester bond         | 3     | 1.276595745 | 0.007127014 |
| immunoglobulin c region | 3     | 1.276595745 | 0.007127014 |
| sulfation               | 4     | 1.70212766  | 0.007435725 |
| phosphoprotein          | 93    | 39.57446809 | 0.007720982 |
| ATP                     | 7     | 2.978723404 | 0.009174195 |
| membrane                | 81    | 34.46808511 | 0.01649583  |
| Fatty acid biosynthesis | 4     | 1.70212766  | 0.01701409  |
| cell membrane           | 31    | 13.19148936 | 0.018684946 |
| tumor suppressor        | 5     | 2.127659574 | 0.020455856 |
| calmodulin-binding      | 5     | 2.127659574 | 0.033890063 |
| sh3 domain              | 7     | 2.978723404 | 0.034520031 |
| ubl conjugation         | 12    | 5.106382979 | 0.047435024 |
| lipoprotein             | 13    | 5.531914894 | 0.047618299 |
| duplication             | 5     | 2.127659574 | 0.054099645 |
| oxidoreductase          | 12    | 5.106382979 | 0.077770979 |

(Continued)

| Term                        | Count | %           | P-Value     |
|-----------------------------|-------|-------------|-------------|
| thioester bond              | 2     | 0.85106383  | 0.079863592 |
| Proto-oncogene              | 4     | 1.70212766  | 0.08178812  |
| Pyrrolidone carboxylic acid | 3     | 1.276595745 | 0.088004782 |
| metalloprotease inhibitor   | 2     | 0.85106383  | 0.090742103 |

**Supplementary Table S3: RT-qPCR analyses of individual animals for expression of B-cell maturation related antigens.**

| Animal | Genotype | Gender | Bcl6     | Blimp1   | CD43     | IgM      | IgD      |
|--------|----------|--------|----------|----------|----------|----------|----------|
| 1451   | wt       | f      | 0.271339 | 1.145588 | 0.705806 | 0.709198 | 0.177013 |
| 1454   | wt       | m      | 0.038736 | 0.093968 | 0.066144 | 0.558738 | 0.029974 |
| 1460   | wt       | m      | 8.20188  | 0.721423 | 3.902207 | 0.250748 | 0.014211 |
| 1520   | wt       | m      | 0.033797 | 0.174896 | 0.127757 | 0.456917 | 0.124269 |
| 1521   | wt       | m      | 0.135677 | 0.924525 | 0.16494  | 0.277375 | 0.037454 |
| 1523   | wt       | f      | 0.028054 | 0.095877 | 0.048391 | 0.195235 | 0.039226 |
| 1526   | wt       | f      | 0.120526 | 0.28323  | 0.324306 | 0.401445 | 0.050215 |
| 1656   | wt       | m      | 0.053368 | 0.108736 | 0.284504 | 0.226677 | 0.057909 |
| 1659   | wt       | m      | 0.161924 | 0.551277 | 0.297023 | 0.653097 | 0.130972 |
| 1749   | wt       | m      | 0.701637 | 3.735392 | 2.918962 | 0.750918 | 0.105922 |
| 1915   | wt       | m      | 0.095955 | 0.336614 | 0.960706 | 0.451744 | 0.13981  |
| 2223   | wt       | f      | 0.283138 | 0.463385 | 0.426341 | 0.613296 | 0.160568 |
| 1910   | wt       | f      | 0.030032 | 0.043638 | 0.063009 | 0.120665 | 0.021617 |
| 1655   | wt       | m      | 0.923301 | 0.619757 | 0.666354 | 0.397616 | 0.31778  |
| 1524   | wt       | f      | 1.150118 | 0.856506 | 411.4145 | 0.382629 | 2.139207 |
| 2937   | wt       |        | 0.19628  | 0.954403 | 0.433843 | 1.408135 | 0.364334 |
| 2378   | wt       | f      | 0.065022 | 0.283746 | 0.193816 | 0.22365  | 0.137365 |
| 2962   | wt       | m      | 0.020592 | 0.077438 | 0.069717 | 0.213156 | 0.038049 |
| 3088   | ko       |        | 0.130181 | 0.372912 | 0.349963 | 0.264002 | 0.127249 |
| 3091   | ko       |        | 0.071145 | 0.721328 | 0.395792 | 0.820457 | 0.138954 |
| 1650   | ko       | f      | 24.11388 | 5.552898 | 698.29   | 0.549226 | 5.102985 |
| 1946   | ko       | m      | 19.37964 | 2.64538  | 603.3702 | 0.383629 | 3.693471 |
| 1947   | ko       | f      | 24.67962 | 2.261896 | 1709.758 | 0.580115 | 6.531063 |
| 1948   | ko       | f      | 32.45105 | 1.64023  | 1704.209 | 0.528875 | 7.289359 |
| 1954   | ko       | m      | 1.312308 | 2.83128  | 0.386467 | 1.10656  | 0.11313  |
| 2037   | ko       | f      | 16.44691 | 1.268977 | 536.9497 | 0.668309 | 5.380701 |
| 2038   | ko       | f      | 35.71832 | 1.959675 | 1262.413 | 0.664103 | 8.780564 |

(Continued)



| <b>Animal</b> | <b>Genotype</b> | <b>Gender</b> | <b>Bcl6</b> | <b>Blimp1</b> | <b>CD43</b> | <b>IgM</b> | <b>IgD</b> |
|---------------|-----------------|---------------|-------------|---------------|-------------|------------|------------|
| 2222          | ko              | f             | 6.066195    | 1.687667      | 290.3511    | 0.311407   | 1.574364   |
| 1958          | ko              | f             | 0.133845    | 0.609388      | 0.570343    | 0.496057   | 0.051101   |
| 2320          | ko              | m             | 0.043995    | 0.332472      | 0.113839    | 0.673455   | 0.321443   |
| 2581          | ko              | m             | 0.044904    | 0.251925      | 0.063658    | 0.500618   | 0.190218   |
| 2590          | ko              | f             | 0.092365    | 0.496068      | 0.172707    | 0.88351    | 0.284531   |
| 2843          | ko              | m             | 0.203623    | 0.472634      | 0.582692    | 1.103613   | 0.227785   |
| 2949          | ko              | f             | 1.158255    | 0.482188      | 0.921204    | 0.36023    | 0.031063   |
| 2589          | ko              | m             | 0.070043    | 0.372983      | 0.223328    | 0.789975   | 0.045549   |
